# Supplementary material for: Self-sacrificial template directed hydrothermal route to kesterite-Cu2ZnSnS4 microspheres and study of their photo response properties
Source: Royal Society of Chemistry journal article supplement (doi:10.1039/c3ce42229a), 2013-12-11
Supplement: c3ce42229a1.pdf [file c3ce42229a1.pdf]

## Supporting Information

### **Self-sacrificial template directed hydrothermal route to kesterite-Cu<sub>2</sub>ZnSnS<sub>4</sub> microspheres and study of their photo response properties**

Samrat Sarkar<sup>a</sup>, Kaustav Bhattacharjee<sup>b</sup>, G.C.Das<sup>b</sup>, K.K.Chattopadhyay<sup>a,c\*</sup>

<sup>a</sup>School of Materials Science and Nanotechnology, Jadavpur University, Kolkata 700032, India

<sup>b</sup>Department of Metallurgical and Material Engineering, Jadavpur University, Kolkata 700032,  
India

<sup>c</sup>Thin film and NanoScience Laboratory, Department of Physics, Jadavpur University, Kolkata  
700032, India

\*Corresponding Author's e-mail: [kalyan\\_chattopadhyay@yahoo.com](mailto:kalyan_chattopadhyay@yahoo.com)

S1.

Crystallographic Information File (CIF)

data\_CZTS microsphere (190 °C/24 h)

\_audit\_creation\_date 'Mon Oct 12 15:11:53 PDT 1998'

\_audit\_creation\_method 'Maud, version 2.33'

\_audit\_update\_record 'Last update Tue Oct 22 18:48:20 IST 2013'

\_computing\_structure\_refinement 'Maud, version 2.33'

\_chemical\_name\_common 'kesterite'

\_chemical\_formula\_sum 'Cu2 Zn Sn S4 '

\_symmetry\_cell\_setting tetragonal

\_symmetry\_space\_group\_name\_H-M I-42m

\_symmetry\_Int\_Tables\_number 121

\_cell\_formula\_units\_Z 1

\_Chemical\_formula\_weight 439.471

loop\_

\_symmetry\_equiv\_pos\_site\_id

\_symmetry\_equiv\_pos\_as\_xyz

1 x,y,z

2 1/2+x,1/2+y,1/2+z

3 -x,y,-z

4 -x,-y,z

5 x,-y,-z

6 1/2-x,1/2+y,1/2-z

7 1/2-x,1/2-y,1/2+z

8  $1/2+x, 1/2-y, 1/2-z$

9  $y, -x, -z$

10  $-y, x, -z$

11  $1/2+y, 1/2-x, 1/2-z$

12  $1/2-y, 1/2+x, 1/2-z$

13  $-y, -x, z$

14  $y, x, z$

15  $1/2-y, 1/2-x, 1/2+z$

16  $1/2+y, 1/2+x, 1/2+z$

\_cell\_length\_a 5.424(1)

\_cell\_length\_b 5.4238105

\_cell\_length\_c 10.808(4)

\_cell\_angle\_alpha 90

\_cell\_angle\_beta 90

\_cell\_angle\_gamma 90

\_cell\_volume 317.958

loop\_

\_atom\_site\_label

\_atom\_site\_type\_symbol

\_atom\_site\_occupancy

\_atom\_site\_fract\_x

\_atom\_site\_fract\_y

\_atom\_site\_fract\_z

\_atom\_site\_B\_iso\_or\_equiv

\_atom\_site\_calc\_flag

Cu(4d) Cu 0.5144217 0.0 0.5 0.25 1.0264388 .

Zn(4d) Zn 0.5136042 0.0 0.5 0.25 1.0264388 .

Cu(2a) Cu 1.0153217 0.0 0.0 0.0 1.1969856 .

Sn(2b) Sn 0.9242791 0.0 0.0 0.5 0.56138307 .

S(8i) S 0.9814857 0.75160086 0.75160086 0.884114 0.61191547 .

\*\*\*\*\*
